# Supplementary material for: Ag/H-ZIF-8 Nanocomposite as an Effective Antibacterial Agent Against Pathogenic Bacteria
Source: PubMed Central journal article supplement (PMC6915408; doi:10.3390/nano9111579), 2019-11-07
Supplement: nanomaterials-09-01579-s001.pdf [file nanomaterials-09-01579-s001.pdf]

# Electronic Supplementary information

for

## **Ag/H-ZIF-8 Nanocomposite as an Effective Antibacterial Agent Against Pathogenic Bacteria**

**Yanmei Zhang<sup>1,2\*</sup>, Xin Zhang<sup>1,2</sup>, Jie Song<sup>1,2</sup>, Liming Jin<sup>1,2</sup>, Xiaotong Wang<sup>1,2</sup>, Chunshan Quan<sup>1,2\*</sup>**

<sup>1</sup>College of Life Science, Dalian Minzu University, Economical and Technological Development Zone, Dalian, 116600, China; <sup>2</sup>Key Laboratory of Biotechnology and Bioresources Utilization (Dalian Minzu University), Ministry of Education, China

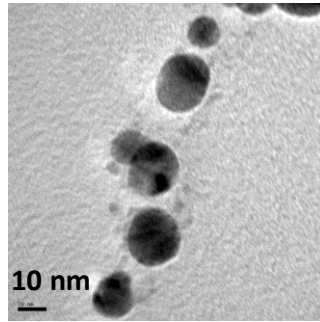

Fig. S1 TEM image of Ag NPs

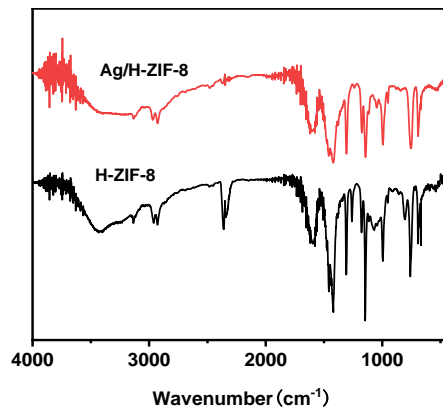

Fig. S2 FT-IR spectra of H-ZIF-8 and Ag/H-ZIF-8

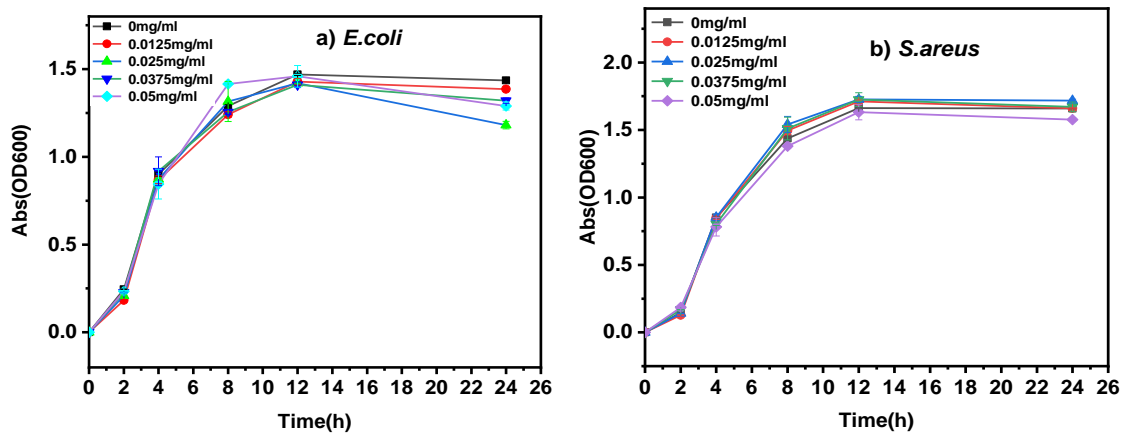

Fig. S3 Growth curves of (a) *S. Aureus* and (b) *E. coli* inoculated with different concentrations of Ag Nps.

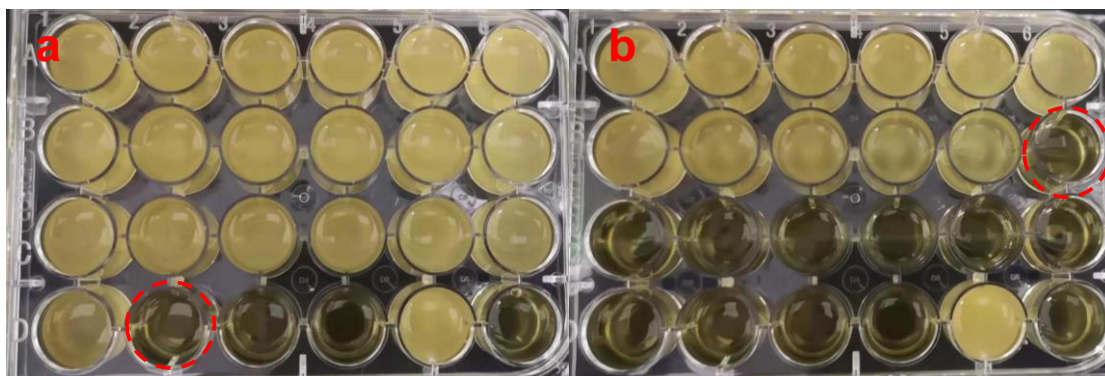

**Fig. S4** MIC of *S. aureus*(a) and *E. coli* (b) inoculated with different concentrations of Ag/H-ZIF-8 Nps.

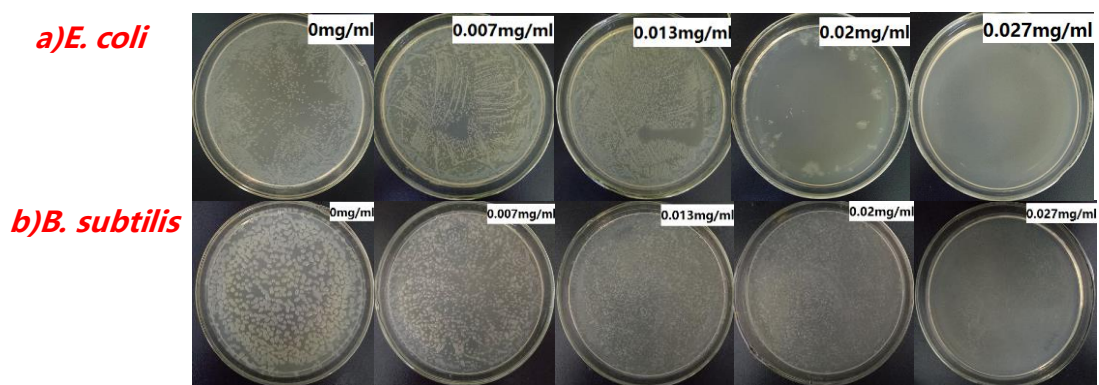

**Fig. S5** *E. coli* (a) and *Bacillus subtilis*(b) grown on agar plates using various concentrations of Ag NPs.
